# Supplementary material
Source: publisher figshare collection journal article supplement (https://acs.figshare.com/ndownloader/files/4543549)

Figure S1. Representative gel electrophoresis (following single worm gPCR) to confirm the identity of wild type and *mtl-1;mtl-2;pcs-1(zs2)*. The amplicon sizes for *mtl-1*, *mtl-2* and *pcs-1* are 1800 bp, 1510 bp and 1343 bp in wild and 1041 bp, 759 bp and 695 bp in the triple knockout, respectively.

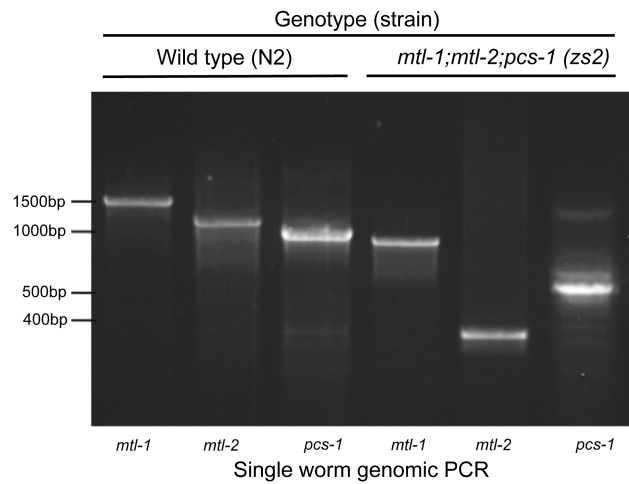

Supplement: Supplementary file 1 [file 4543549]
